# Supplementary material for: Electrochemical conversion of 5-hydroxymethylfurfural over CuNi bimetallic catalysts: the synergistic effect of interfacial active sites
Source: Royal Society of Chemistry journal article supplement (doi:10.1039/d4qi00145a), 2024-01-01
Supplement: d4qi00145a1.pdf [file d4qi00145a1.pdf]

## Supplementary Information

# Electrochemical conversion of 5-hydroxymethylfurfural over CuNi bimetallic catalyst: the synergistic of interfacial active sites

*Yiwei Zhao<sup>a</sup>, Chao Zhang<sup>\*a</sup>, Shuangxi Xing<sup>\*b</sup>, Zuhang Jin<sup>a</sup>, and Tingting Xiao<sup>c</sup>*

<sup>a</sup> School of Environment, Northeast Normal University, Changchun 130117, PR China.

<sup>b</sup> Faculty of Chemistry, Northeast Normal University, Changchun 130024, PR China.

<sup>c</sup> State Key Laboratory of Electroanalytical Chemistry, Changchun Institute of Applied Chemistry,  
Chinese Academy of Sciences, Changchun 130022, PR China

\* Corresponding authors at: School of Environment, Northeast Normal University, Changchun  
130117, PR China.

Email addresses: E-mail: [zhangc614@nenu.edu.cn](mailto:zhangc614@nenu.edu.cn), and [xingsx737@nenu.edu.cn](mailto:xingsx737@nenu.edu.cn)

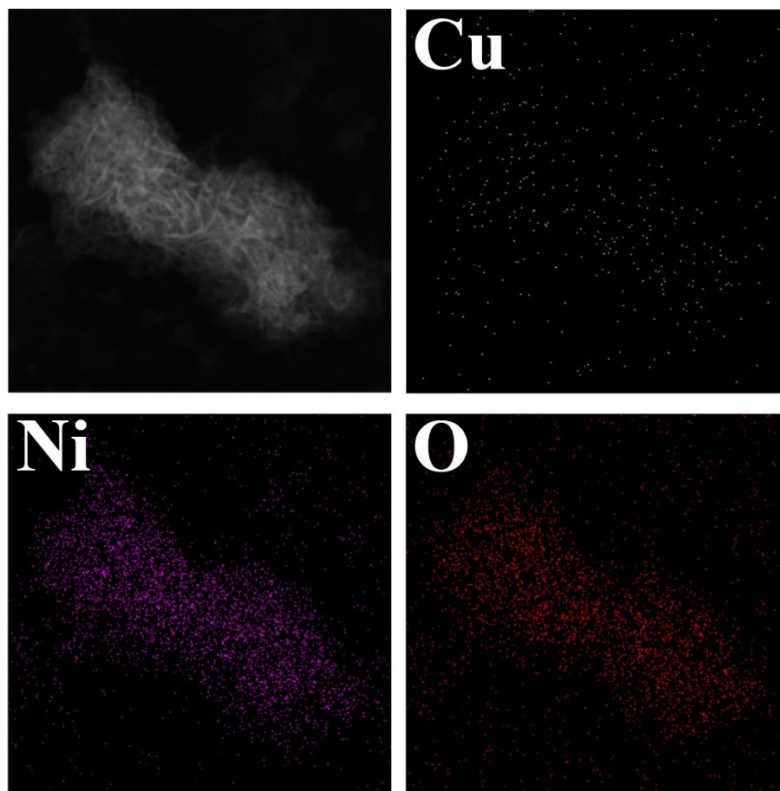

**Fig. S1.** Elemental maps of Cu, Ni, O of Ni(OH)<sub>2</sub>-NCF.

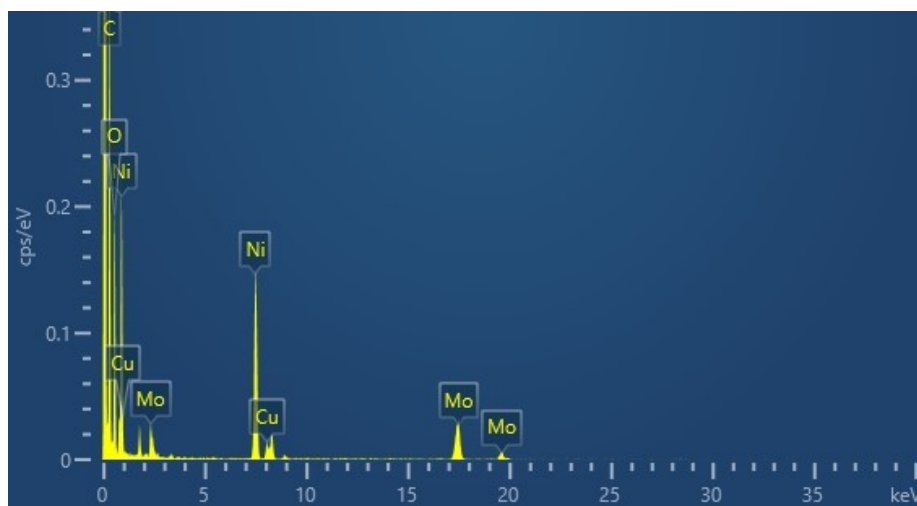

**Fig. S2.** Energy-dispersive spectroscopy spectrum of Ni(OH)<sub>2</sub>-NCF.

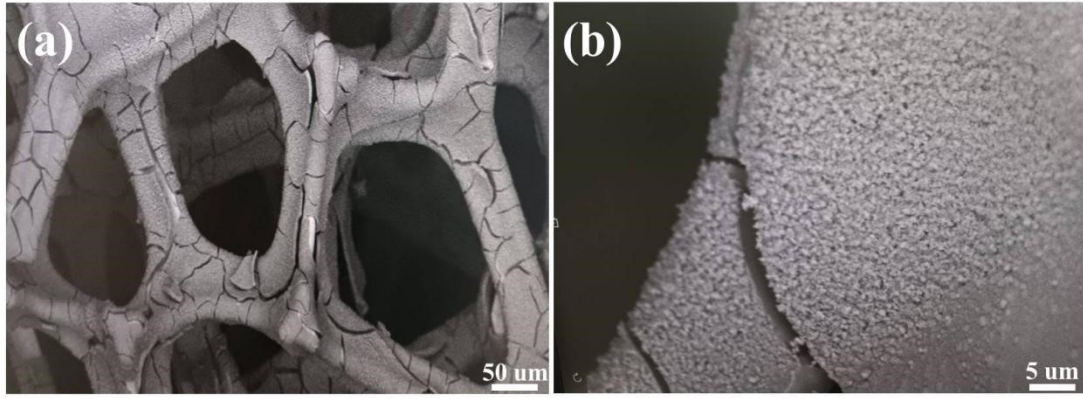

**Fig. S3.** SEM images of Ni(OH)<sub>2</sub>-NCF: (a) high magnification; (b) low magnification.

**Table S1.** ICP test of Ni content before and after deposition of Ni(OH)<sub>2</sub>-NCF-900.

|                               | <b>Before deposition</b> | <b>After deposition</b> |
|-------------------------------|--------------------------|-------------------------|
| <b>Ni content in solution</b> | 9.68 ug/mL               | 4.88 ug/mL              |

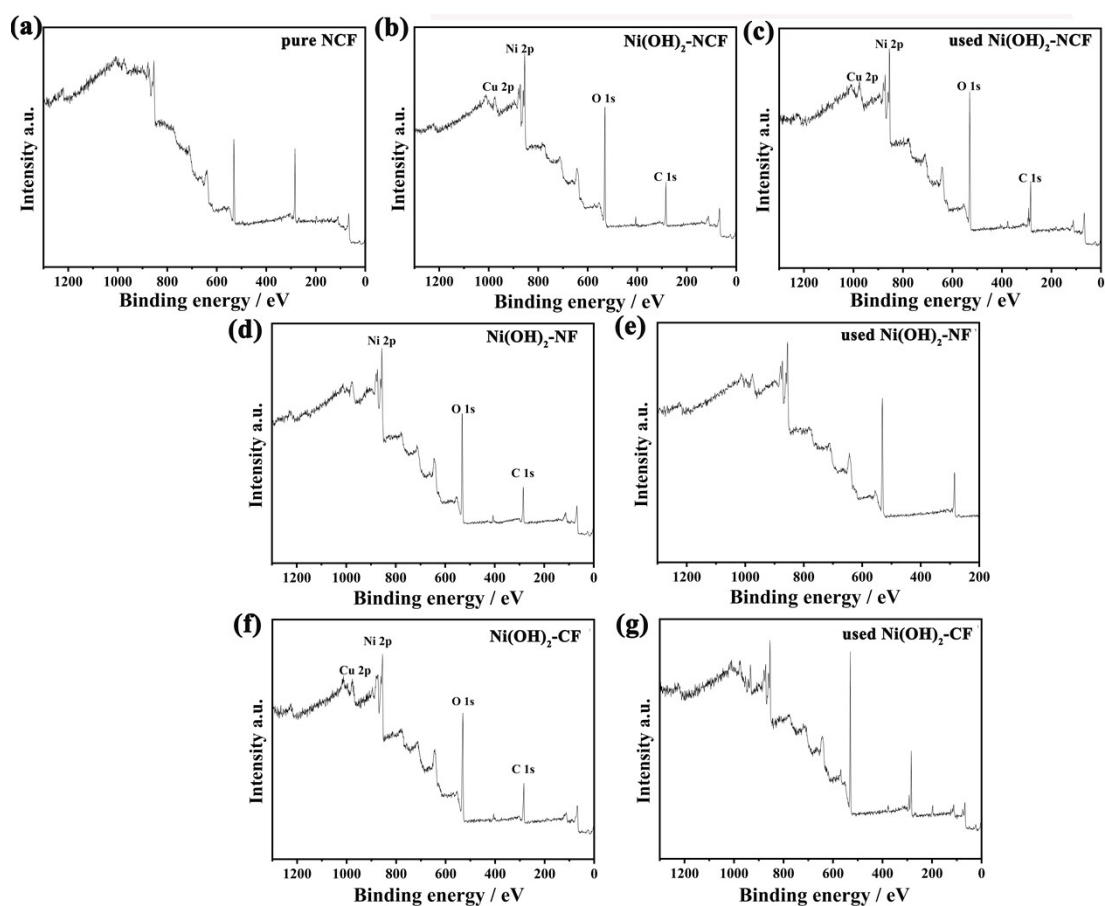

**Fig. S4.** XPS survey spectra of the catalysts: (a) pure NCF; (b)  $\text{Ni(OH)}_2\text{-NCF}$ ; (c) used  $\text{Ni(OH)}_2\text{-NCF}$ ; (d)  $\text{Ni(OH)}_2\text{-NF}$ ; (e) used  $\text{Ni(OH)}_2\text{-NF}$ ; (f)  $\text{Ni(OH)}_2\text{-CF}$ ; (g) used  $\text{Ni(OH)}_2\text{-CF}$ .

**Table S2.** XPS O 1s components of the different electrocatalysts.

| <b>Electrocatalysts</b>  | <b>O I (%)</b> | <b>O II (%)</b> | <b>O III (%)</b> |
|--------------------------|----------------|-----------------|------------------|
| Ni(OH) <sub>2</sub> -NCF | 25             | 51              | 24               |
| Ni(OH) <sub>2</sub> -NF  | 11             | 58              | 31               |
| Ni(OH) <sub>2</sub> -CF  | 23             | 57              | 20               |

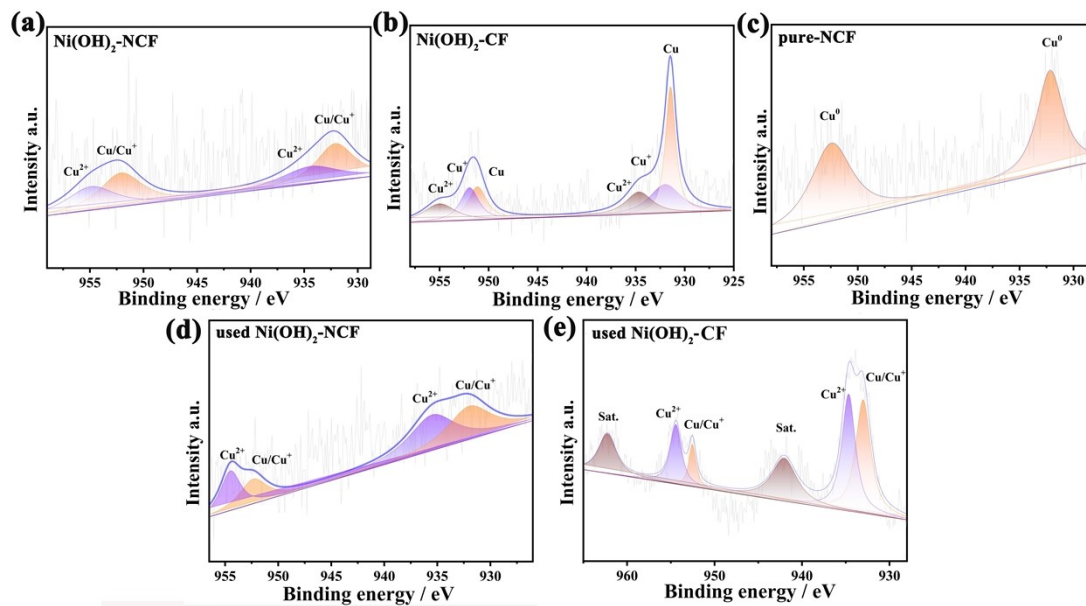

**Fig. S5.** The XPS Cu 2p spectra of the catalysts: (a)  $\text{Ni(OH)}_2\text{-NCF}$ ; (b)  $\text{Ni(OH)}_2\text{-CF}$ ; (c) pure-NCF; (d) used  $\text{Ni(OH)}_2\text{-NCF}$ ; (e) used  $\text{Ni(OH)}_2\text{-CF}$ .



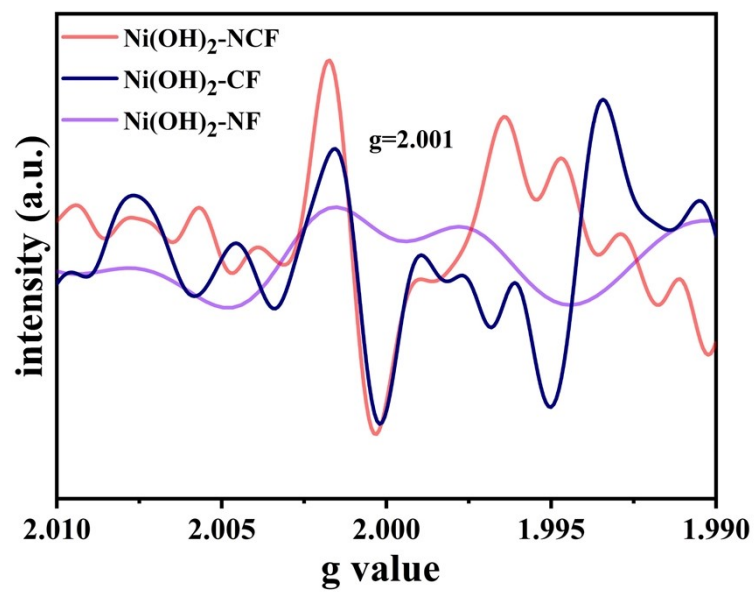

**Fig. S6.** EPR spectra of Ni(OH)<sub>2</sub>-NCF, Ni(OH)<sub>2</sub>-NF and Ni(OH)<sub>2</sub>-CF.

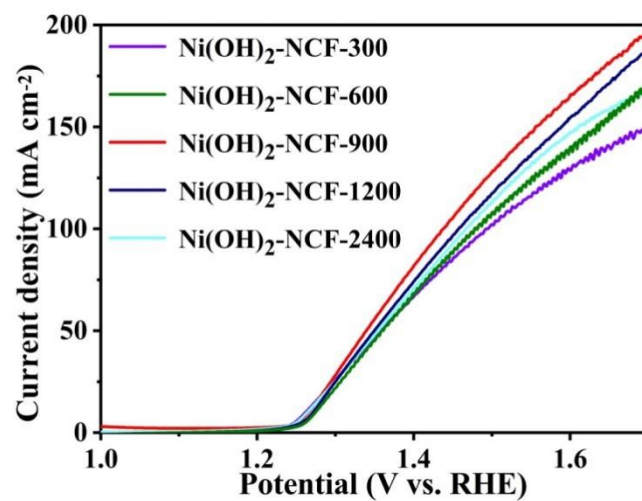

**Fig. S7.** LSV curves of the catalysts with 10 mM HMF in 1 M KOH.

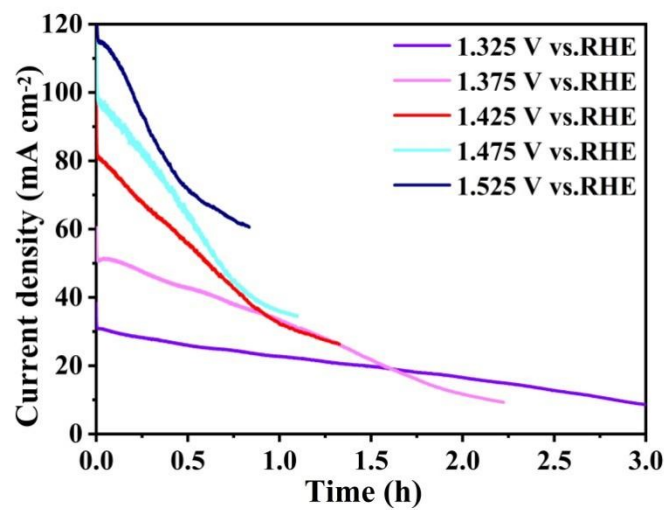

**Fig. S8.** Chronoamperometric curves of Ni(OH)<sub>2</sub>-NCF under different potentials.

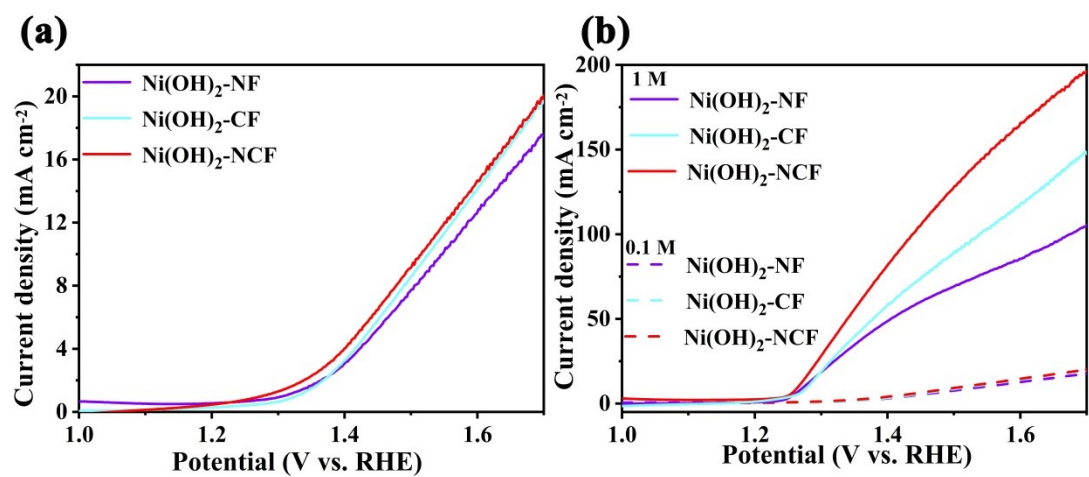

**Fig. S9.** (a) LSV curves (no compensation) of Ni(OH)<sub>2</sub>-NCF, Ni(OH)<sub>2</sub>-NF, and Ni(OH)<sub>2</sub>-CF with 10 mM HMF in 0.1 M KOH; (b) Comparison of LSV curves of catalysts with HMF in 1 M and 0.1 M KOH.

**Table S3.** Current density and electrocatalytic performance of different electrocatalysts for HMFOR.

| Entry | Catalysts                                            | Current density (mA/cm <sup>2</sup> ) | Potential (vs. RHE) | KOH | FDCA yield (%) | FE (%) | Ref.      |
|-------|------------------------------------------------------|---------------------------------------|---------------------|-----|----------------|--------|-----------|
| 1     | CF-Cu(OH) <sub>2</sub>                               | 55                                    | 1.82 V              | 1 M | 98.7           | 100    | 1         |
| 2     | Cu <sub>x</sub> S@NiCo-LDHs                          | 87                                    | 1.3                 | 1 M | 100            | 99     | 2         |
| 3     | NiCu NTs                                             | 136                                   | 1.424               | 1 M | 99             | 99     | 3         |
| 4     | CF-CuO/Ni-BTC MOF                                    | 47.6                                  | 1.475               | 1 M | 99.9           | 91.0   | 4         |
| 5     | Ni <sub>x</sub> Se <sub>y</sub> -NiFe LDH@NF         | 135                                   | 1.423               | 1 M | 99.3           | 98.9   | 5         |
| 6     | Ni <sub>3</sub> S <sub>2</sub> -MoS <sub>2</sub> /NF | 68                                    | -                   | 1 M | 93-96          | 100    | 6         |
| 7     | Cr-Ni(OH) <sub>2</sub> /NF                           | 230                                   | -                   | 1 M | 98             | 96     | 7         |
| 8     | NF@Ni <sub>0.85</sub> Se                             | 50                                    | 1.5                 | 1 M | -              | 95     | 8         |
| 9     | Ni <sub>3</sub> N@C                                  | 50                                    | 1.38                | 1 M | 98             | -      | 9         |
| 10    | Ni(OH) <sub>2</sub> -NCF                             | 93.2                                  | 1.425               | 1 M | 99             | 98.5   | This work |

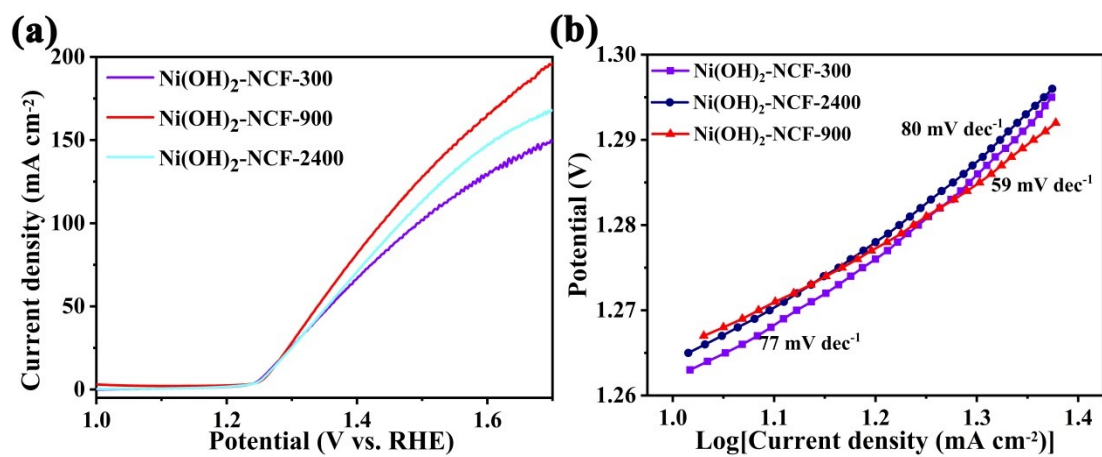

**Fig. S10.** (a) LSV curves of the catalysts with 10 mM HMF in 1 M KOH, (b) Tafel slope of the catalysts.

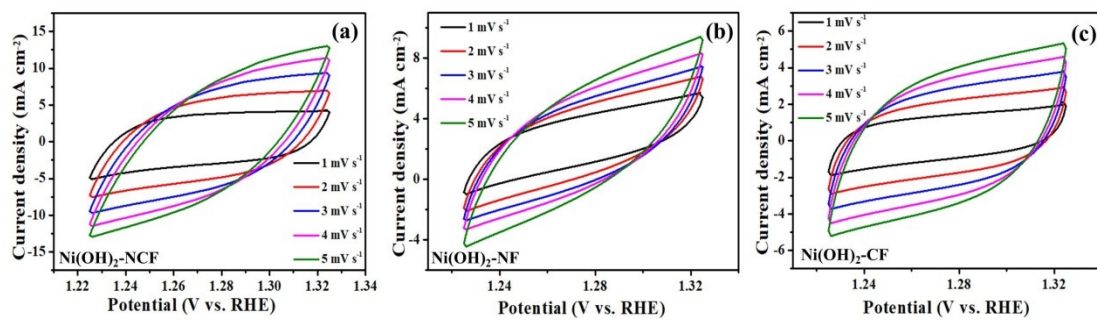

**Fig. S11.**  $C_{dl}$  of Ni(OH)<sub>2</sub>-NCF, Ni(OH)<sub>2</sub>-NF, and Ni(OH)<sub>2</sub>-CF measured by CVs in 1 M KOH with 10 mM HMF with a scan rate of 1 to 5 mV/s.

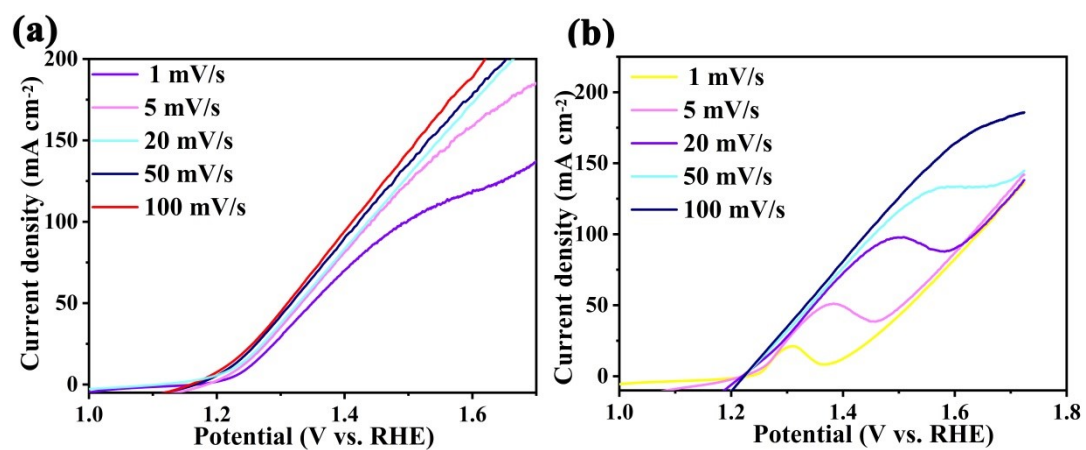

**Fig. S12.** (a) HMFOR process on Ni(OH)<sub>2</sub>-NCF with different scan rates; (b) OER process on Ni(OH)<sub>2</sub>-NCF with different scan rates.



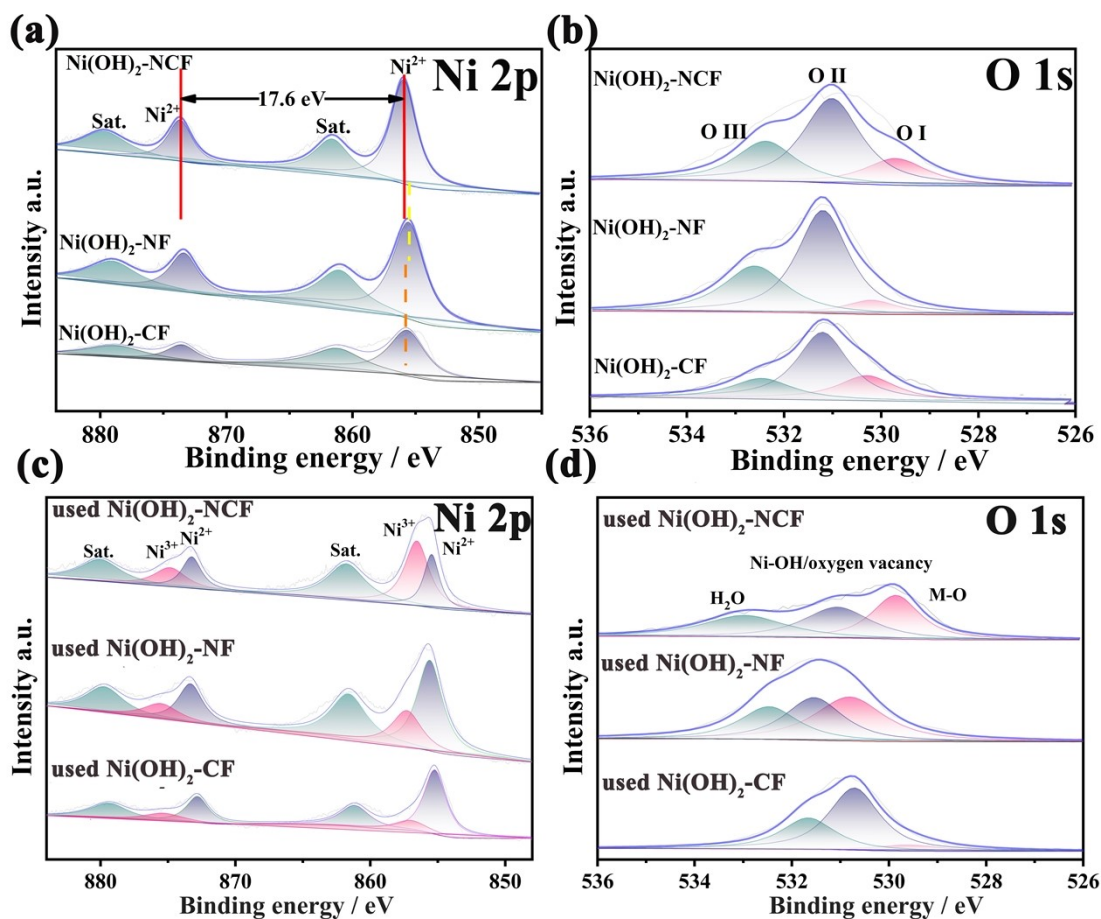

**Fig. S13.** XPS results of the fresh and used Ni(OH)<sub>2</sub>-NCF, Ni(OH)<sub>2</sub>-NF, and Ni(OH)<sub>2</sub>-CF catalysts for HMFOR: (a) Ni 2p and (b) O 1s.

**Table S4.** XPS Ni 2p components of the different electrocatalysts.

| <b>Electrocatalysts</b>       | <b>Ni<sup>3+</sup>(%)</b> | <b>Ni<sup>2+</sup>(%)</b> | <b>Ni<sup>0</sup>(%)</b> |
|-------------------------------|---------------------------|---------------------------|--------------------------|
| Used-Ni(OH) <sub>2</sub> -NCF | 60.2                      | 39.7                      | 0                        |
| Used-Ni(OH) <sub>2</sub> -NF  | 32.5                      | 67.5                      | 0                        |
| Used-Ni(OH) <sub>2</sub> -CF  | 22.5                      | 77.5                      | 0                        |

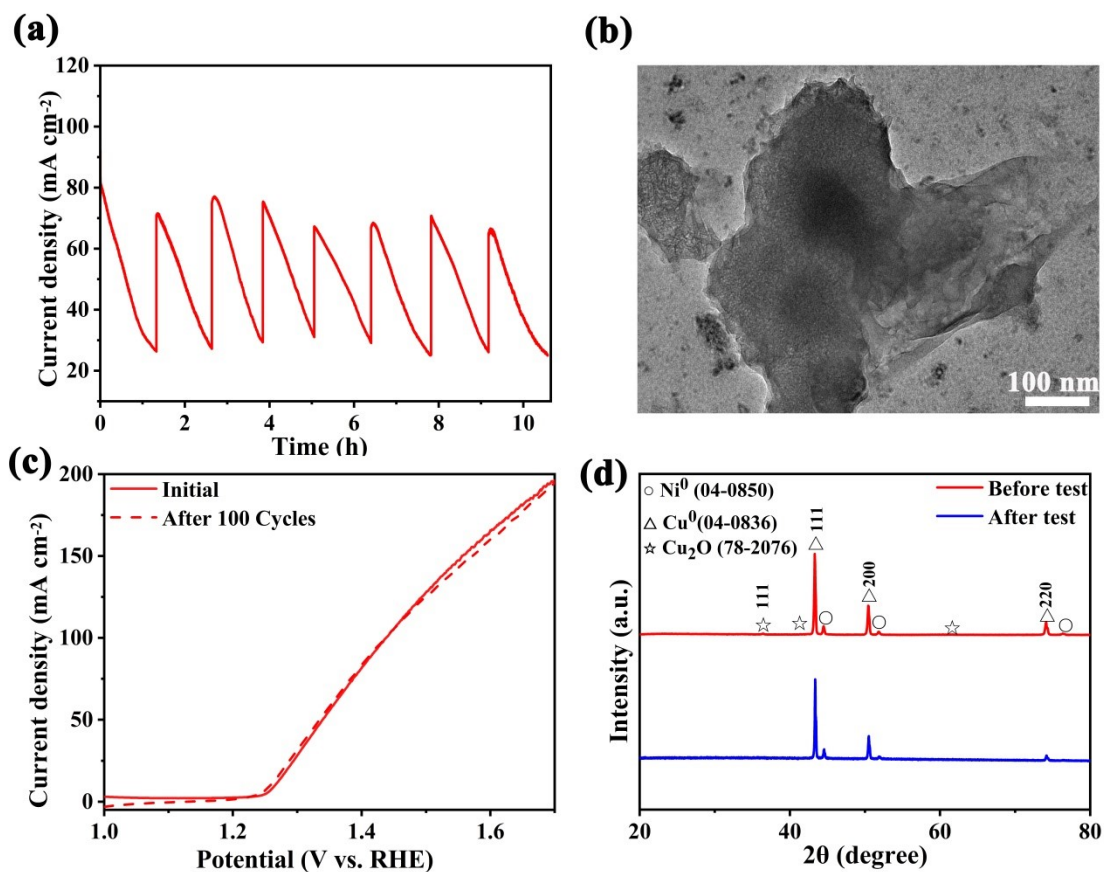

**Fig. S14.** (a) Consecutive 8 runs of HMFOR at a constant voltage of 1.425 V with the intermittent addition of 10 mM HMF; (b) TEM of the Ni(OH)<sub>2</sub>-NCF after recycling; (c) LSV curve of Ni(OH)<sub>2</sub>-NCF after 100 cycles (All test in 1 M KOH containing 10 mM HMF); (d) The XRD of Ni(OH)<sub>2</sub>-NCF before and after HMFOR.

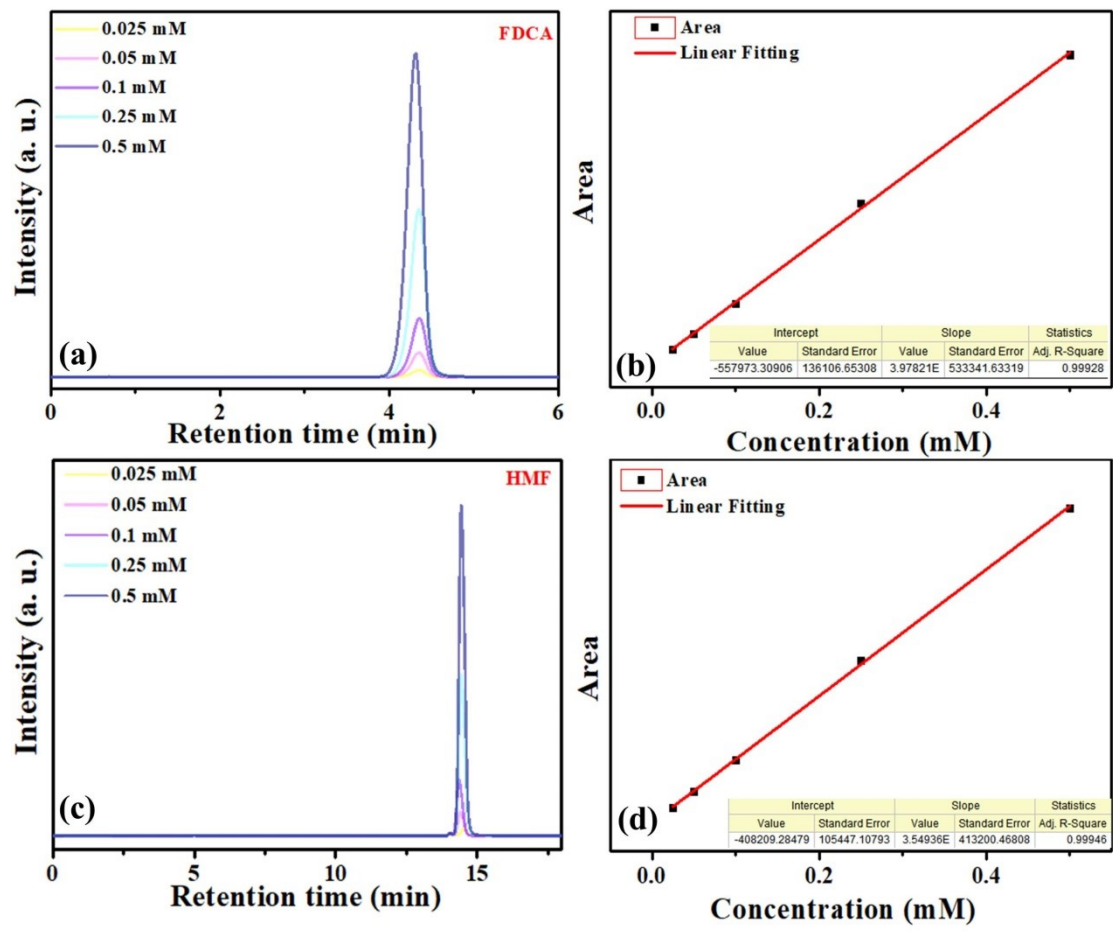

**Fig. S15.** HPLC analysis results and the standard curves: (a) and (b) FDCA; (c) and (d) HMF.

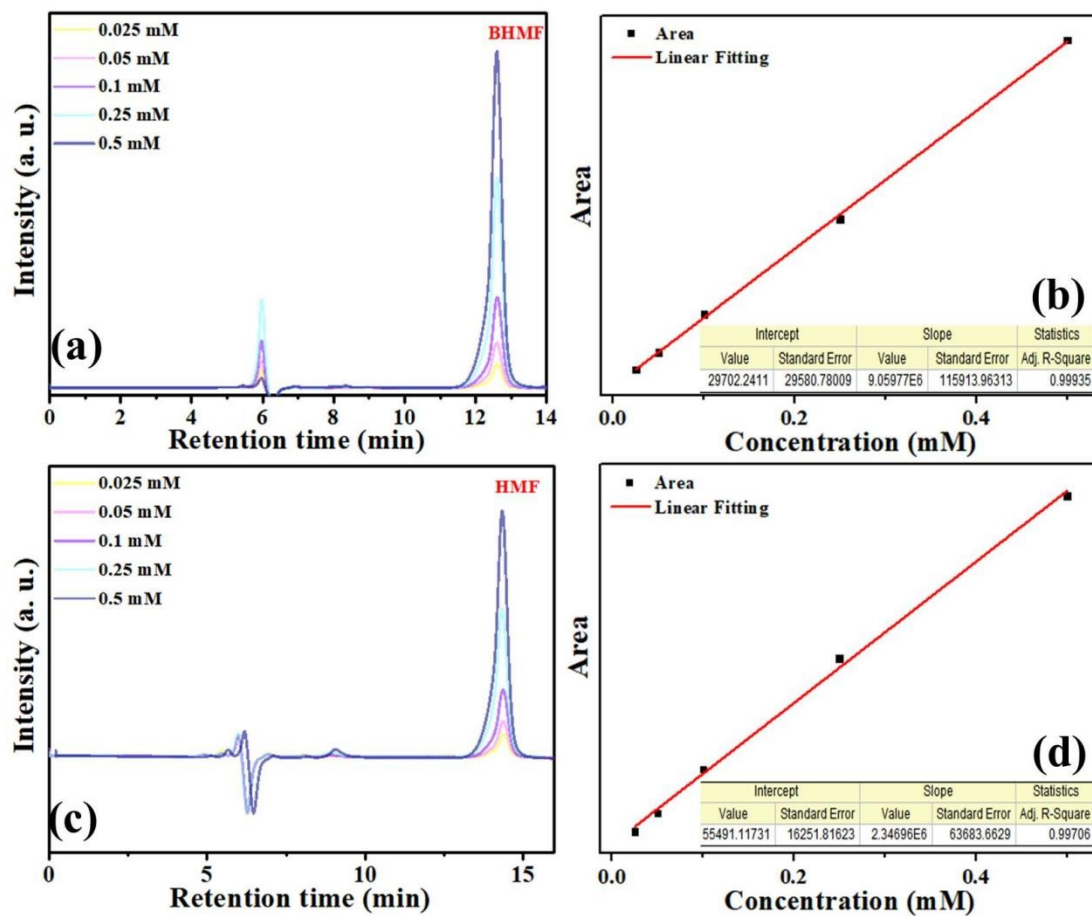

Fig. S16. HPLC analysis results and the standard curves: (a), (b) BHMf; (c), (d) HMF.

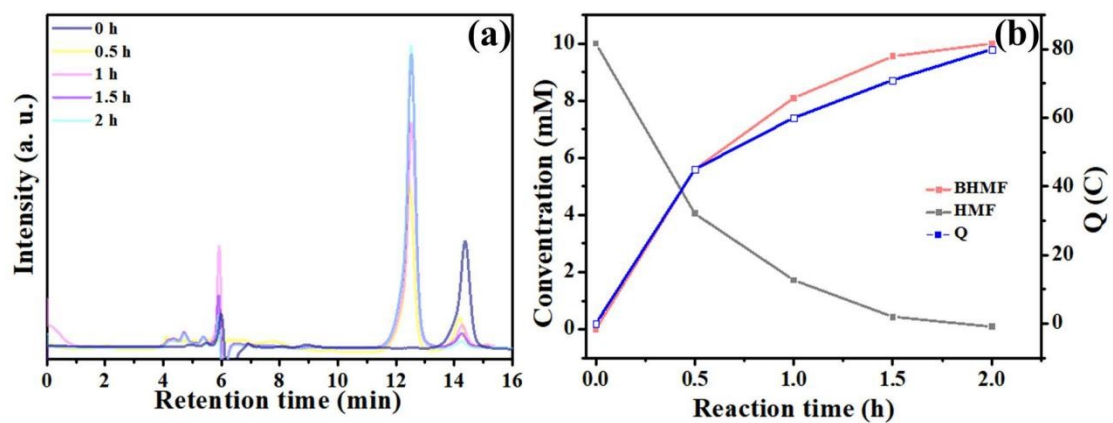

**Fig. S17.** (a) HPLC results of HMFRR on Cu-NCF at -0.275 V; (b) The concentration changes of HMF and BHMf during the HMFRR.

## REFERENCES

1. X. Pang, H. Bai, H. Zhao, W. Fan and W. Shi, Efficient electrocatalytic oxidation of 5-hydroxymethylfurfural coupled with 4-nitrophenol hydrogenation in a water system, *ACS Catal.*, 2022, **12**, 1545-1557.
2. X. Deng, X. Kang, M. Li, K. Xiang, C. Wang, Z. Guo, J. Zhang, X.-Z. Fu and J.-L. Luo, Coupling efficient biomass upgrading with H<sub>2</sub> production via bifunctional Cu<sub>x</sub>S@NiCo-LDH core-shell nanoarray electrocatalysts, *J. Mater. Chem. A*, 2020, **8**, 1138-1146.
3. L. Zheng, Y. Zhao, P. Xu, Z. Lv, X. Shi and H. Zheng, Biomass upgrading coupled with H<sub>2</sub> production via a nonprecious and versatile Cu-doped nickel nanotube electrocatalyst, *J. Mater. Chem. A*, 2022, **10**, 10181-10191.
4. X. Pang, H. Bai, Y. Huang, H. Zhao, G. Zheng and W. Fan, Mechanistic insights for dual-species evolution toward 5-hydroxymethylfurfural oxidation, *J. Catal.*, 2023, **417**, 22-34.
5. Y. Zhong, R.-Q. Ren, J.-B. Wang, Y.-Y. Peng, Q. Li and Y.-M. Fan, Grass-like Ni<sub>x</sub>Se<sub>y</sub> nanowire arrays shelled with NiFe LDH nanosheets as a 3D hierarchical core-shell electrocatalyst for efficient upgrading of biomass-derived 5-hydroxymethylfurfural and furfural, *Catal. Sci. Technol.*, 2022, **12**, 201-211.
6. S. Yang, Y. Guo, Y. Zhao, L. Zhang, H. Shen, J. Wang, J. Li, C. Wu, W. Wang, Y. Cao, S. Zhuo, Q. Zhang and H. Zhang, Construction of Synergistic Ni<sub>3</sub>S<sub>2</sub>-MoS<sub>2</sub> Nanoheterojunctions on Ni Foam as Bifunctional Electrocatalyst for Hydrogen Evolution Integrated with Biomass Valorization, *Small*, 2022, **18**, 2201306.
7. Z. Yang, B. Zhang, C. Yan, Z. Xue and T. Mu, The pivot to achieve high current density for biomass electrooxidation: Accelerating the reduction of Ni<sup>3+</sup> to Ni<sup>2+</sup>, *Appl. Catal., B*, 2023, **330**, 122590.
8. C. Yang, C. Wang, L. Zhou, W. Duan, Y. Song, F. Zhang, Y. Zhen, J. Zhang, W. Bao, Y. Lu, D. Wang and F. Fu, Refining d-band center in Ni<sub>0.85</sub>Se by Mo doping: a strategy for boosting hydrogen generation via coupling electrocatalytic oxidation 5-hydroxymethylfurfural, *Chem. Eng. J.*, 2021, **422**, 130125.
9. N. Zhang, Y. Zou, L. Tao, W. Chen, L. Zhou, Z. Liu, B. Zhou, G. Huang, H. Lin and S. Wang, Electrochemical Oxidation of 5-Hydroxymethylfurfural on Nickel Nitride/Carbon Nanosheets: Reaction Pathway Determined by In Situ Sum Frequency Generation Vibrational Spectroscopy, *Angew. Chem. Int. Ed.*, 2019, **58**, 15895-15903.
